# Supplementary material for: Oral Administration of Porphyromonas gingivalis Alters the Gut Microbiome and Serum Metabolome
Source: PubMed Central journal article supplement (PMC6193602; doi:10.1128/msphere.00460-18), 2018-10-17

# Supplementary Figure 1B

## Phylum

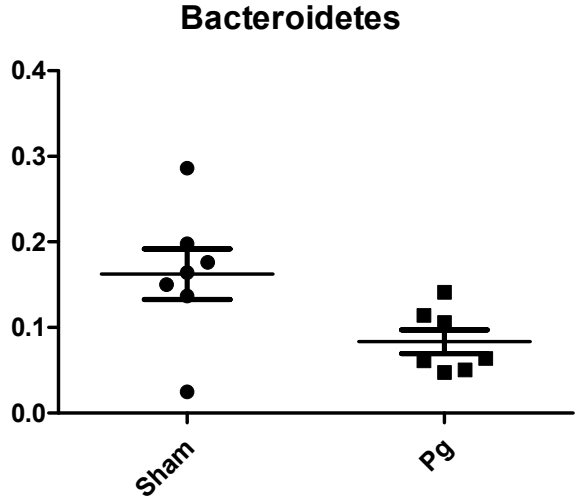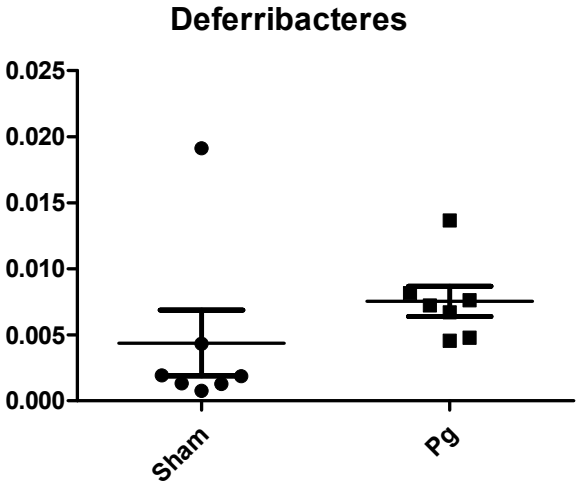

Family

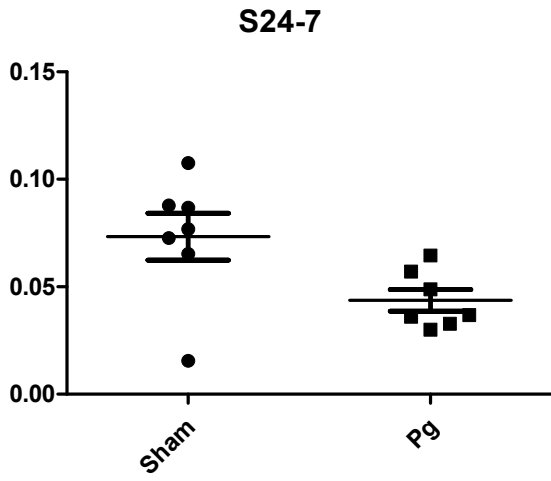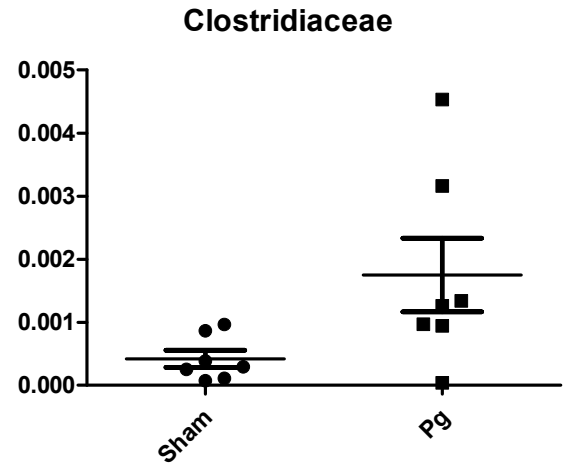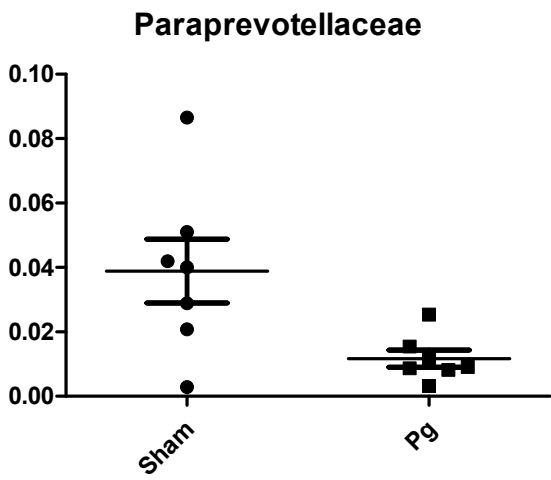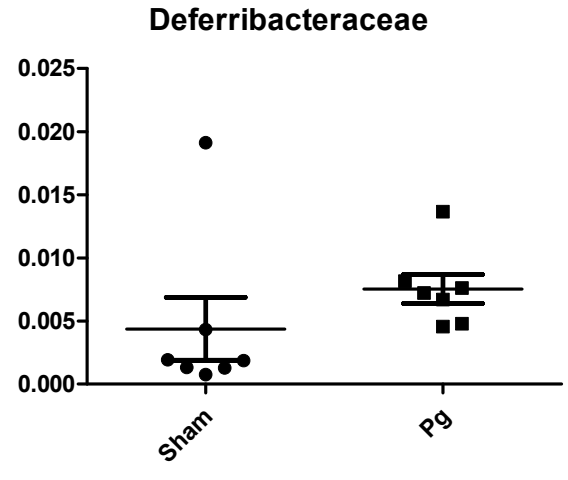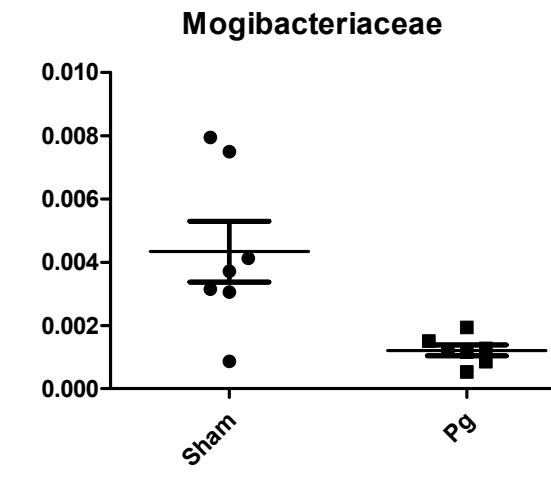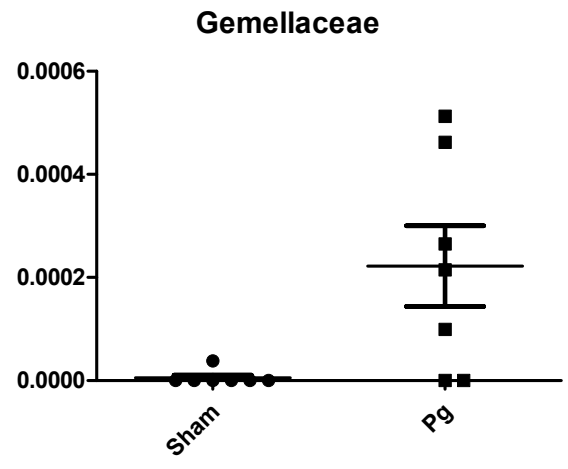

Figure 1B

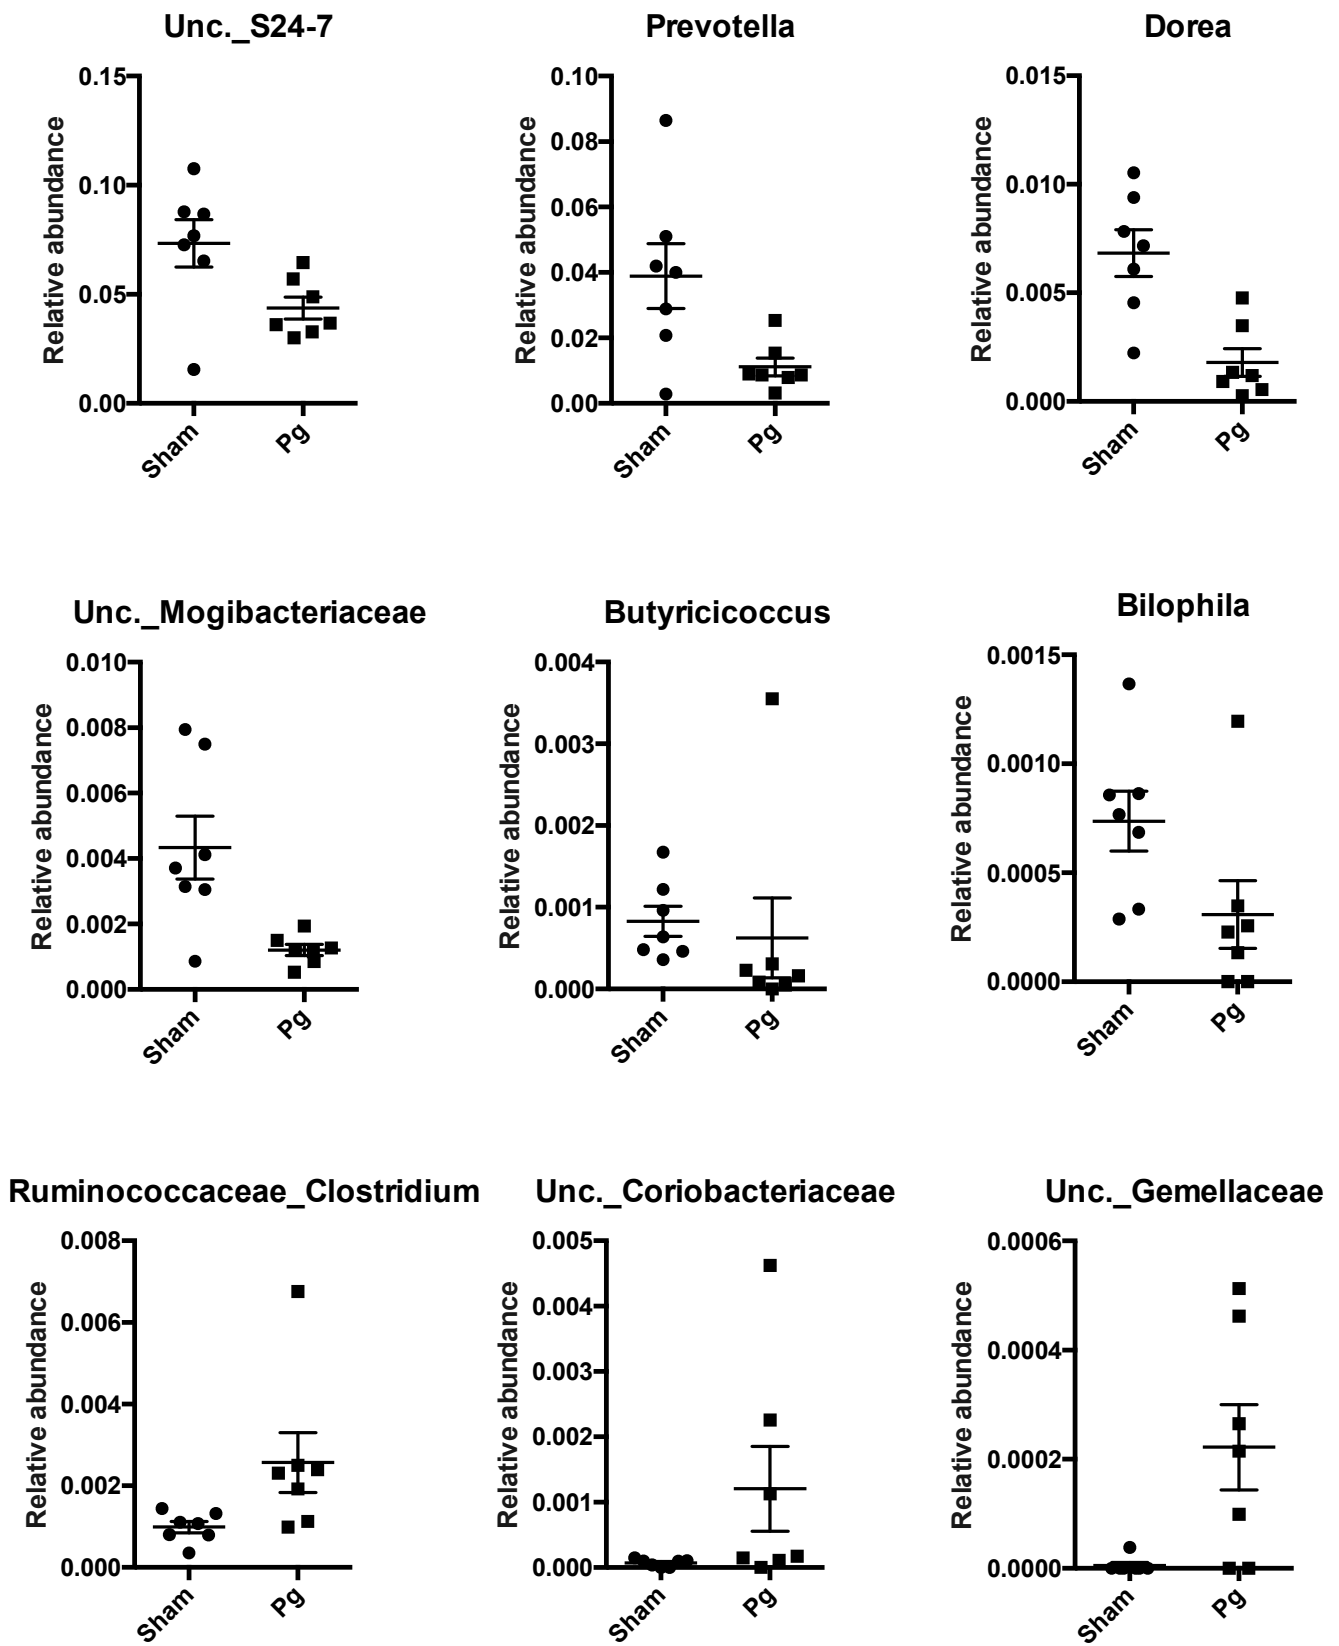

Supplement: sph005182660sf1.pdf [file sph005182660sf1.pdf]
